# Supplementary figures and images for: Efficient marker-assisted breeding for clubroot resistance in elite Pol-CMS rapeseed varieties by updating the PbBa8.1 locus
Source: Research Square preprint supplement (doi:10.21203/rs.3.rs-1531391/v1), 2022-04-12

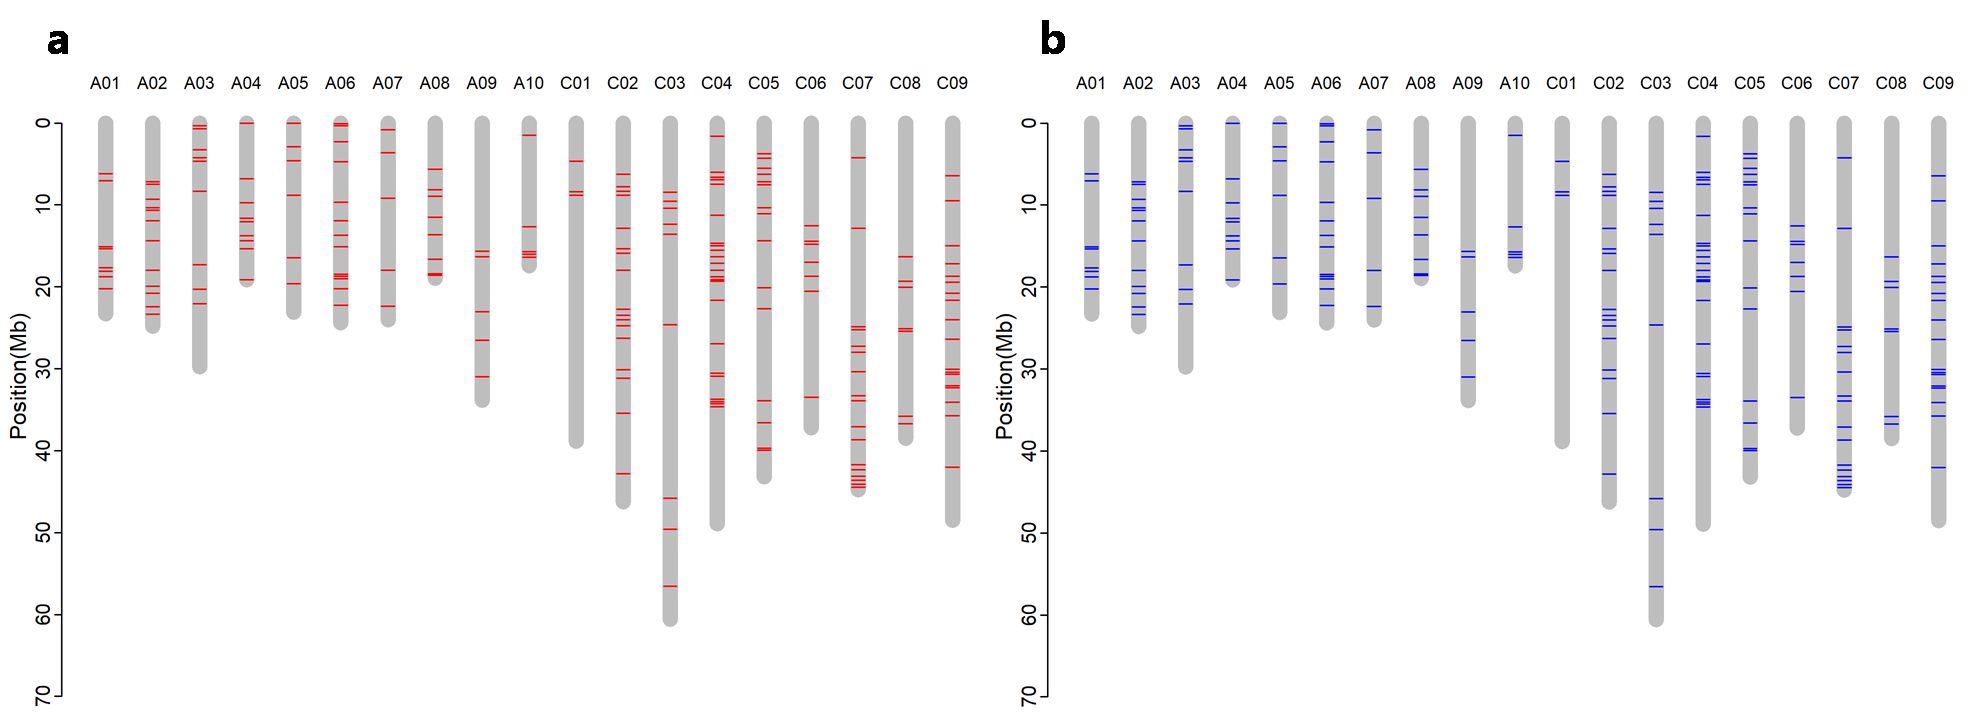

Supplement: Supplementary file 1 [file 2514cf12ac3fce4d2da1af7f.docx]
